# Supplementary material for: p16Ink4a, a marker of cellular senescence, is associated with renal disease in the B6.NZMSle1/Sle2/Sle3 mouse model of lupus
Source: HighWire-hosted journal article supplement (doi:10.1136/lupus-2023-001010), 2023-10-01
Supplement: lupus-2023-001010supp002_data_supplement.pdf [file lupus-2023-001010supp002_data_supplement.pdf]

A.

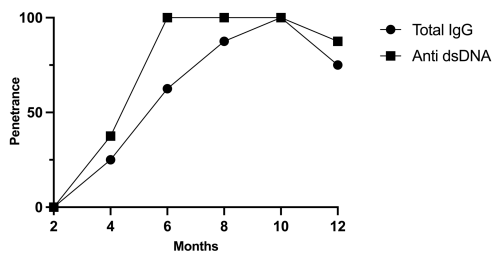

B.

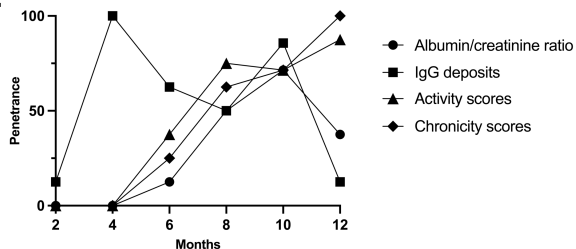

C.

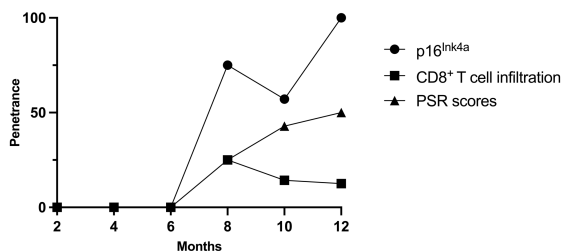

**Supplementary Figure S2: Penetrance of systemic and renal disease parameters, kidney p16<sup>Ink4a</sup> staining, CD8<sup>+</sup> T cell infiltration and fibrosis in B6.*Slc1.2.3* mice over time.** In the aging cohort (2 B6 and 7-8 B6.*Slc1.2.3* mice per time-point): **A.** Penetrance of systemic disease parameters (circles: total IgG levels, squares: anti-double-stranded DNA antibody levels), **B.** Penetrance of renal disease parameters (circles: urine albumin/creatinine ratio, squares: IgG deposition, triangles: activity scores, diamonds: chronicity scores), and **C.** Penetrance of p16<sup>Ink4a</sup> staining (circles), CD8<sup>+</sup> T cell infiltration (squares), and PSR scores (triangles). Penetrance is defined as the percentage of B6.*Slc1.2.3* mice with scores above the Mean + 2 S.D. of corresponding scores from all twelve (2-12 month old) B6 mice.
